# Supplementary material for: Platelet-to-lymphocyte ratio as a predictive factor of complete pathologic response to neoadjuvant chemotherapy in breast cancer
Source: PubMed Central journal article supplement (PMC6235359; doi:10.1371/journal.pone.0207224), 2018-11-14
Supplement: pone.0207224.s001.pdf [file pone.0207224.s001.pdf]

```

CROSSTABS
  /TABLES=RECNLR BY PR
  /FORMAT=AVALUE TABLES
  /STATISTICS=CHISQ RISK
  /CELLS=COUNT COLUMN
  /COUNT ROUND CELL.

```

## Crosstabs

### Notes

|                        |                           |                                                                                                                                           |
|------------------------|---------------------------|-------------------------------------------------------------------------------------------------------------------------------------------|
| Output Created         |                           | 25-oct-2016 14:24:38                                                                                                                      |
| Comments               |                           |                                                                                                                                           |
| Input                  | Data                      | C:\Users\levasquez\Documents\2016\Matologia\NRI.sav                                                                                       |
|                        | Active Dataset            | DataSet1                                                                                                                                  |
|                        | Filter                    | <none>                                                                                                                                    |
|                        | Weight                    | <none>                                                                                                                                    |
|                        | Split File                | <none>                                                                                                                                    |
|                        | N of Rows in Working Data | 288                                                                                                                                       |
|                        | File                      |                                                                                                                                           |
| Missing Value Handling | Definition of Missing     | User-defined missing values are treated as missing.                                                                                       |
|                        | Cases Used                | Statistics for each table are based on all the cases with valid data in the specified range(s) for all variables in each table.           |
| Syntax                 |                           | <pre> CROSSTABS   /TABLES=RECNLR BY PR   /FORMAT=AVALUE TABLES   /STATISTICS=CHISQ RISK   /CELLS=COUNT COLUMN   /COUNT ROUND CELL. </pre> |
| Resources              | Processor Time            | 00:00:00,000                                                                                                                              |
|                        | Elapsed Time              | 00:00:00,000                                                                                                                              |
|                        | Dimensions Requested      | 2                                                                                                                                         |

**Notes**

|                        |                           |                                                                                                                                   |
|------------------------|---------------------------|-----------------------------------------------------------------------------------------------------------------------------------|
| Output Created         |                           | 25-oct-2016 14:24:38                                                                                                              |
| Comments               |                           |                                                                                                                                   |
| Input                  | Data                      | C:\Users\evasquez\Documents\2016\Mastologia\NRI.sav                                                                               |
|                        | Active Dataset            | DataSet1                                                                                                                          |
|                        | Filter                    | <none>                                                                                                                            |
|                        | Weight                    | <none>                                                                                                                            |
|                        | Split File                | <none>                                                                                                                            |
|                        | N of Rows in Working Data | 288                                                                                                                               |
|                        | File                      |                                                                                                                                   |
| Missing Value Handling | Definition of Missing     | User-defined missing values are treated as missing.                                                                               |
|                        | Cases Used                | Statistics for each table are based on all the cases with valid data in the specified range(s) for all variables in each table.   |
| Syntax                 |                           | CROSSTABS<br>/TABLES=RECNLR BY PR<br>/FORMAT=AVALUE TABLES<br>/STATISTICS=CHISQ RISK<br>/CELLS=COUNT COLUMN<br>/COUNT ROUND CELL. |
| Resources              | Processor Time            | 00:00:00,000                                                                                                                      |
|                        | Elapsed Time              | 00:00:00,000                                                                                                                      |
|                        | Dimensions Requested      | 2                                                                                                                                 |
|                        | Cells Available           | 174762                                                                                                                            |

[DataSet1] C:\Users\evasquez\Documents\2016\Mastologia\NRI.sav

**Case Processing Summary**

|             | Cases |         |         |         |       |         |
|-------------|-------|---------|---------|---------|-------|---------|
|             | Valid |         | Missing |         | Total |         |
|             | N     | Percent | N       | Percent | N     | Percent |
| RECNLR * PR | 288   | 100,0%  | 0       | ,0%     | 288   | 100,0%  |

**RECNLN \* PR Crosstabulation**

|        |   |             | PR     |        | Total  |
|--------|---|-------------|--------|--------|--------|
|        |   |             | 0      | 1      |        |
| RECNLN | 1 | Count       | 178    | 81     | 259    |
|        |   | % within PR | 89,4%  | 91,0%  | 89,9%  |
|        | 2 | Count       | 21     | 8      | 29     |
|        |   | % within PR | 10,6%  | 9,0%   | 10,1%  |
| Total  |   | Count       | 199    | 89     | 288    |
|        |   | % within PR | 100,0% | 100,0% | 100,0% |

**Chi-Square Tests**

|                                    | Value             | df | Asymp. Sig. (2-sided) | Exact Sig. (2-sided) | Exact Sig. (1-sided) |
|------------------------------------|-------------------|----|-----------------------|----------------------|----------------------|
| Pearson Chi-Square                 | ,166 <sup>a</sup> | 1  | ,684                  |                      |                      |
| Continuity Correction <sup>b</sup> | ,038              | 1  | ,845                  |                      |                      |
| Likelihood Ratio                   | ,169              | 1  | ,681                  |                      |                      |
| Fisher's Exact Test                |                   |    |                       | ,833                 | ,431                 |
| N of Valid Cases                   | 288               |    |                       |                      |                      |

a. 0 cells (.0%) have expected count less than 5. The minimum expected count is 8,96.

b. Computed only for a 2x2 table

**Risk Estimate**

|                               | Value | 95% Confidence Interval |       |
|-------------------------------|-------|-------------------------|-------|
|                               |       | Lower                   | Upper |
| Odds Ratio for RECNLN (1 / 2) | ,837  | ,356                    | 1,970 |
| For cohort PR = 0             | ,949  | ,747                    | 1,206 |
| For cohort PR = 1             | 1,134 | ,612                    | 2,100 |
| N of Valid Cases              | 288   |                         |       |

SORT CASES BY Quart\_age.  
 SPLIT FILE SEPARATE BY Quart\_age.

```

CROSSTABS
  /TABLES=RECNLR BY PR
  /FORMAT=AVALUE TABLES
  /STATISTICS=CHISQ RISK
  /CELLS=COUNT COLUMN
  /COUNT ROUND CELL.

```

## Crosstabs

### Notes

|                        |                           |                                                                                                                                           |
|------------------------|---------------------------|-------------------------------------------------------------------------------------------------------------------------------------------|
| Output Created         |                           | 25-oct-2016 14:27:11                                                                                                                      |
| Comments               |                           |                                                                                                                                           |
| Input                  | Data                      | C:\Users\levasquez\Documents\2016\Matologia\NRI.sav                                                                                       |
|                        | Active Dataset            | DataSet1                                                                                                                                  |
|                        | Filter                    | <none>                                                                                                                                    |
|                        | Weight                    | <none>                                                                                                                                    |
|                        | Split File                | Quart_age                                                                                                                                 |
|                        | N of Rows in Working Data | 288                                                                                                                                       |
|                        | File                      |                                                                                                                                           |
| Missing Value Handling | Definition of Missing     | User-defined missing values are treated as missing.                                                                                       |
|                        | Cases Used                | Statistics for each table are based on all the cases with valid data in the specified range(s) for all variables in each table.           |
| Syntax                 |                           | <pre> CROSSTABS   /TABLES=RECNLR BY PR   /FORMAT=AVALUE TABLES   /STATISTICS=CHISQ RISK   /CELLS=COUNT COLUMN   /COUNT ROUND CELL. </pre> |
| Resources              | Processor Time            | 00:00:00,015                                                                                                                              |
|                        | Elapsed Time              | 00:00:00,015                                                                                                                              |
|                        | Dimensions Requested      | 2                                                                                                                                         |
|                        | Cells Available           | 174762                                                                                                                                    |

[DataSet1] C:\Users\evasquez\Documents\2016\Mastologia\NRI.sav

## Quart\_age = 1

**Case Processing Summary<sup>a</sup>**

|             | Cases |         |         |         |       |         |
|-------------|-------|---------|---------|---------|-------|---------|
|             | Valid |         | Missing |         | Total |         |
|             | N     | Percent | N       | Percent | N     | Percent |
| RECNLN * PR | 18    | 100,0%  | 0       | ,0%     | 18    | 100,0%  |

a. Quart\_age = 1

**RECNLN \* PR Crosstabulation<sup>a</sup>**

|        |   |             | PR     |        | Total  |
|--------|---|-------------|--------|--------|--------|
|        |   |             | 0      | 1      |        |
| RECNLN | 1 | Count       | 13     | 3      | 16     |
|        |   | % within PR | 92,9%  | 75,0%  | 88,9%  |
|        | 2 | Count       | 1      | 1      | 2      |
|        |   | % within PR | 7,1%   | 25,0%  | 11,1%  |
| Total  |   | Count       | 14     | 4      | 18     |
|        |   | % within PR | 100,0% | 100,0% | 100,0% |

a. Quart\_age = 1

**Chi-Square Tests<sup>c</sup>**

|                                    | Value              | df | Asymp. Sig. (2-sided) | Exact Sig. (2-sided) | Exact Sig. (1-sided) |
|------------------------------------|--------------------|----|-----------------------|----------------------|----------------------|
| Pearson Chi-Square                 | 1,004 <sup>a</sup> | 1  | ,316                  |                      |                      |
| Continuity Correction <sup>b</sup> | ,010               | 1  | ,920                  |                      |                      |
| Likelihood Ratio                   | ,854               | 1  | ,355                  |                      |                      |
| Fisher's Exact Test                |                    |    |                       | ,405                 | ,405                 |

|                  |    |  |  |  |
|------------------|----|--|--|--|
| N of Valid Cases | 18 |  |  |  |
|------------------|----|--|--|--|

- a. 3 cells (75,0%) have expected count less than 5. The minimum expected count is ,44.
- b. Computed only for a 2x2 table
- c. Quart\_age = 1

**Risk Estimate<sup>a</sup>**

|                               | Value | 95% Confidence Interval |        |
|-------------------------------|-------|-------------------------|--------|
|                               |       | Lower                   | Upper  |
| Odds Ratio for RECCLR (1 / 2) | 4,333 | ,207                    | 90,847 |
| For cohort PR = 0             | 1,625 | ,398                    | 6,628  |
| For cohort PR = 1             | ,375  | ,067                    | 2,096  |
| N of Valid Cases              | 18    |                         |        |

- a. Quart\_age = 1

## Quart\_age = 2

**Case Processing Summary<sup>a</sup>**

|             | Cases |         |         |         |       |         |
|-------------|-------|---------|---------|---------|-------|---------|
|             | Valid |         | Missing |         | Total |         |
|             | N     | Percent | N       | Percent | N     | Percent |
| RECCLR * PR | 32    | 100,0%  | 0       | ,0%     | 32    | 100,0%  |

- a. Quart\_age = 2

**RECCLR \* PR Crosstabulation<sup>a</sup>**

|        |             |             | PR    |        | Total |
|--------|-------------|-------------|-------|--------|-------|
|        |             |             | 0     | 1      |       |
| RECCLR | 1           | Count       | 20    | 10     | 30    |
|        |             | % within PR | 90,9% | 100,0% | 93,8% |
| 2      | Count       | 2           | 0     | 2      |       |
|        | % within PR | 9,1%        | ,0%   | 6,3%   |       |

|       |             |        |        |        |
|-------|-------------|--------|--------|--------|
| Total | Count       | 22     | 10     | 32     |
|       | % within PR | 100,0% | 100,0% | 100,0% |

a. Quart\_age = 2

#### Chi-Square Tests<sup>c</sup>

|                                    | Value             | df | Asymp. Sig. (2-sided) | Exact Sig. (2-sided) | Exact Sig. (1-sided) |
|------------------------------------|-------------------|----|-----------------------|----------------------|----------------------|
| Pearson Chi-Square                 | ,970 <sup>a</sup> | 1  | ,325                  |                      |                      |
| Continuity Correction <sup>b</sup> | ,039              | 1  | ,844                  |                      |                      |
| Likelihood Ratio                   | 1,559             | 1  | ,212                  |                      |                      |
| Fisher's Exact Test                |                   |    |                       | 1,000                | ,466                 |
| N of Valid Cases                   | 32                |    |                       |                      |                      |

a. 2 cells (50,0%) have expected count less than 5. The minimum expected count is ,63.

b. Computed only for a 2x2 table

c. Quart\_age = 2

#### Risk Estimate<sup>a</sup>

|                   | Value | 95% Confidence Interval |       |
|-------------------|-------|-------------------------|-------|
|                   |       | Lower                   | Upper |
| For cohort PR = 0 | ,667  | ,518                    | ,859  |
| N of Valid Cases  | 32    |                         |       |

a. Quart\_age = 2

### Quart\_age = 3

#### Case Processing Summary<sup>a</sup>

|             | Cases |         |         |         |       |         |
|-------------|-------|---------|---------|---------|-------|---------|
|             | Valid |         | Missing |         | Total |         |
|             | N     | Percent | N       | Percent | N     | Percent |
| RECCLR * PR | 78    | 100,0%  | 0       | ,0%     | 78    | 100,0%  |

a. Quart\_age = 3

**RECNLN \* PR Crosstabulation<sup>a</sup>**

|        |   |             | PR     |        | Total  |
|--------|---|-------------|--------|--------|--------|
|        |   |             | 0      | 1      |        |
| RECNLN | 1 | Count       | 49     | 22     | 71     |
|        |   | % within PR | 90,7%  | 91,7%  | 91,0%  |
|        | 2 | Count       | 5      | 2      | 7      |
|        |   | % within PR | 9,3%   | 8,3%   | 9,0%   |
| Total  |   | Count       | 54     | 24     | 78     |
|        |   | % within PR | 100,0% | 100,0% | 100,0% |

a. Quart\_age = 3

**Chi-Square Tests<sup>c</sup>**

|                                    | Value             | df | Asymp. Sig. (2-sided) | Exact Sig. (2-sided) | Exact Sig. (1-sided) |
|------------------------------------|-------------------|----|-----------------------|----------------------|----------------------|
| Pearson Chi-Square                 | ,017 <sup>a</sup> | 1  | ,895                  |                      |                      |
| Continuity Correction <sup>b</sup> | ,000              | 1  | 1,000                 |                      |                      |
| Likelihood Ratio                   | ,018              | 1  | ,894                  |                      |                      |
| Fisher's Exact Test                |                   |    |                       | 1,000                | ,632                 |
| N of Valid Cases                   | 78                |    |                       |                      |                      |

a. 2 cells (50,0%) have expected count less than 5. The minimum expected count is 2,15.

b. Computed only for a 2x2 table

c. Quart\_age = 3

**Risk Estimate<sup>a</sup>**

|                               | Value | 95% Confidence Interval |       |
|-------------------------------|-------|-------------------------|-------|
|                               |       | Lower                   | Upper |
| Odds Ratio for RECNLN (1 / 2) | ,891  | ,160                    | 4,952 |
| For cohort PR = 0             | ,966  | ,590                    | 1,583 |
| For cohort PR = 1             | 1,085 | ,320                    | 3,680 |
| N of Valid Cases              | 78    |                         |       |

a. Quart\_age = 3



**Quart\_age = 4**

**Case Processing Summary<sup>a</sup>**

|             | Cases |         |         |         |       |         |
|-------------|-------|---------|---------|---------|-------|---------|
|             | Valid |         | Missing |         | Total |         |
|             | N     | Percent | N       | Percent | N     | Percent |
| RECNLN * PR | 91    | 100,0%  | 0       | ,0%     | 91    | 100,0%  |

a. Quart\_age = 4

**RECNLN \* PR Crosstabulation<sup>a</sup>**

|        |   |             | PR     |        | Total  |
|--------|---|-------------|--------|--------|--------|
|        |   |             | 0      | 1      |        |
| RECNLN | 1 | Count       | 56     | 27     | 83     |
|        |   | % within PR | 93,3%  | 87,1%  | 91,2%  |
|        | 2 | Count       | 4      | 4      | 8      |
|        |   | % within PR | 6,7%   | 12,9%  | 8,8%   |
| Total  |   | Count       | 60     | 31     | 91     |
|        |   | % within PR | 100,0% | 100,0% | 100,0% |

a. Quart\_age = 4

**Chi-Square Tests<sup>c</sup>**

|                                    | Value             | df | Asymp. Sig. (2-sided) | Exact Sig. (2-sided) | Exact Sig. (1-sided) |
|------------------------------------|-------------------|----|-----------------------|----------------------|----------------------|
| Pearson Chi-Square                 | ,991 <sup>a</sup> | 1  | ,319                  |                      |                      |
| Continuity Correction <sup>b</sup> | ,366              | 1  | ,545                  |                      |                      |
| Likelihood Ratio                   | ,945              | 1  | ,331                  |                      |                      |
| Fisher's Exact Test                |                   |    |                       | ,437                 | ,266                 |
| N of Valid Cases                   | 91                |    |                       |                      |                      |

a. 1 cells (25,0%) have expected count less than 5. The minimum expected count is 2,73.

b. Computed only for a 2x2 table

**Chi-Square Tests<sup>c</sup>**

|                                    | Value             | df | Asymp. Sig. (2-sided) | Exact Sig. (2-sided) | Exact Sig. (1-sided) |
|------------------------------------|-------------------|----|-----------------------|----------------------|----------------------|
| Pearson Chi-Square                 | ,991 <sup>a</sup> | 1  | ,319                  |                      |                      |
| Continuity Correction <sup>b</sup> | ,366              | 1  | ,545                  |                      |                      |
| Likelihood Ratio                   | ,945              | 1  | ,331                  |                      |                      |
| Fisher's Exact Test                |                   |    |                       | ,437                 | ,266                 |
| N of Valid Cases                   | 91                |    |                       |                      |                      |

a. 1 cells (25,0%) have expected count less than 5. The minimum expected count is 2,73.

b. Computed only for a 2x2 table

c. Quart\_age = 4

**Risk Estimate<sup>a</sup>**

|                               | Value | 95% Confidence Interval |       |
|-------------------------------|-------|-------------------------|-------|
|                               |       | Lower                   | Upper |
| Odds Ratio for RECCLR (1 / 2) | 2,074 | ,482                    | 8,931 |
| For cohort PR = 0             | 1,349 | ,664                    | 2,742 |
| For cohort PR = 1             | ,651  | ,305                    | 1,390 |
| N of Valid Cases              | 91    |                         |       |

a. Quart\_age = 4

**Quart\_age = 5**

**Case Processing Summary<sup>a</sup>**

|             | Cases |         |         |         |       |         |
|-------------|-------|---------|---------|---------|-------|---------|
|             | Valid |         | Missing |         | Total |         |
|             | N     | Percent | N       | Percent | N     | Percent |
| RECCLR * PR | 50    | 100,0%  | 0       | ,0%     | 50    | 100,0%  |

a. Quart\_age = 5

**RECCLR \* PR Crosstabulation<sup>a</sup>**

|        |   |             | PR     |        | Total  |
|--------|---|-------------|--------|--------|--------|
|        |   |             | 0      | 1      |        |
| RECNLR | 1 | Count       | 31     | 13     | 44     |
|        |   | % within PR | 86,1%  | 92,9%  | 88,0%  |
|        | 2 | Count       | 5      | 1      | 6      |
|        |   | % within PR | 13,9%  | 7,1%   | 12,0%  |
| Total  |   | Count       | 36     | 14     | 50     |
|        |   | % within PR | 100,0% | 100,0% | 100,0% |

a. Quart\_age = 5

#### Chi-Square Tests<sup>c</sup>

|                                    | Value             | df | Asymp. Sig. (2-sided) | Exact Sig. (2-sided) | Exact Sig. (1-sided) |
|------------------------------------|-------------------|----|-----------------------|----------------------|----------------------|
| Pearson Chi-Square                 | ,434 <sup>a</sup> | 1  | ,510                  |                      |                      |
| Continuity Correction <sup>b</sup> | ,030              | 1  | ,861                  |                      |                      |
| Likelihood Ratio                   | ,476              | 1  | ,490                  |                      |                      |
| Fisher's Exact Test                |                   |    |                       | ,663                 | ,455                 |
| N of Valid Cases                   | 50                |    |                       |                      |                      |

a. 2 cells (50,0%) have expected count less than 5. The minimum expected count is 1,68.

b. Computed only for a 2x2 table

c. Quart\_age = 5

#### Risk Estimate<sup>a</sup>

|                               | Value | 95% Confidence Interval |        |
|-------------------------------|-------|-------------------------|--------|
|                               |       | Lower                   | Upper  |
| Odds Ratio for RECNLR (1 / 2) | ,477  | ,051                    | 4,491  |
| For cohort PR = 0             | ,845  | ,563                    | 1,269  |
| For cohort PR = 1             | 1,773 | ,280                    | 11,234 |
| N of Valid Cases              | 50    |                         |        |

a. Quart\_age = 5

**Quart\_age = 6**

**Case Processing Summary<sup>a</sup>**

|             | Cases |         |         |         |       |         |
|-------------|-------|---------|---------|---------|-------|---------|
|             | Valid |         | Missing |         | Total |         |
|             | N     | Percent | N       | Percent | N     | Percent |
| RECNLN * PR | 19    | 100,0%  | 0       | ,0%     | 19    | 100,0%  |

a. Quart\_age = 6

**RECNLN \* PR Crosstabulation<sup>a</sup>**

|        |   |             | PR     |        | Total  |
|--------|---|-------------|--------|--------|--------|
|        |   |             | 0      | 1      |        |
| RECNLN | 1 | Count       | 9      | 6      | 15     |
|        |   | % within PR | 69,2%  | 100,0% | 78,9%  |
|        | 2 | Count       | 4      | 0      | 4      |
|        |   | % within PR | 30,8%  | ,0%    | 21,1%  |
| Total  |   | Count       | 13     | 6      | 19     |
|        |   | % within PR | 100,0% | 100,0% | 100,0% |

a. Quart\_age = 6

**Chi-Square Tests<sup>c</sup>**

|                                    | Value              | df | Asymp. Sig. (2-sided) | Exact Sig. (2-sided) | Exact Sig. (1-sided) |
|------------------------------------|--------------------|----|-----------------------|----------------------|----------------------|
| Pearson Chi-Square                 | 2,338 <sup>a</sup> | 1  | ,126                  |                      |                      |
| Continuity Correction <sup>b</sup> | ,854               | 1  | ,356                  |                      |                      |
| Likelihood Ratio                   | 3,509              | 1  | ,061                  |                      |                      |
| Fisher's Exact Test                |                    |    |                       | ,255                 | ,184                 |
| N of Valid Cases                   | 19                 |    |                       |                      |                      |

a. 3 cells (75,0%) have expected count less than 5. The minimum expected count is 1,26.

b. Computed only for a 2x2 table

c. Quart\_age = 6

**Risk Estimate<sup>a</sup>**

|                   | Value | 95% Confidence Interval |       |
|-------------------|-------|-------------------------|-------|
|                   |       | Lower                   | Upper |
| For cohort PR = 0 | ,600  | ,397                    | ,907  |
| N of Valid Cases  | 19    |                         |       |

a. Quart\_age = 6

```

SORT CASES BY menopausia.
SPLIT FILE SEPARATE BY menopausia.
CROSSTABS
  /TABLES=RECNLR BY PR
  /FORMAT=AVALUE TABLES
  /STATISTICS=CHISQ RISK
  /CELLS=COUNT COLUMN
  /COUNT ROUND CELL.

```

## Crosstabs

### Notes

|                        |                           |                                                                                                                                          |
|------------------------|---------------------------|------------------------------------------------------------------------------------------------------------------------------------------|
| Output Created         |                           | 25-oct-2016 14:27:40                                                                                                                     |
| Comments               |                           |                                                                                                                                          |
| Input                  | Data                      | C:\Users\levasquez\Documents\2016\W<br>astologia\NRI.sav                                                                                 |
|                        | Active Dataset            | DataSet1                                                                                                                                 |
|                        | Filter                    | <none>                                                                                                                                   |
|                        | Weight                    | <none>                                                                                                                                   |
|                        | Split File                | menopausia                                                                                                                               |
|                        | N of Rows in Working Data | 288                                                                                                                                      |
|                        | File                      |                                                                                                                                          |
| Missing Value Handling | Definition of Missing     | User-defined missing values are<br>treated as missing.                                                                                   |
|                        | Cases Used                | Statistics for each table are based on<br>all the cases with valid data in the<br>specified range(s) for all variables in<br>each table. |

|           |                        |  |              |
|-----------|------------------------|--|--------------|
| Syntax    | CROSSTABS              |  |              |
|           | /TABLES=RECNL R BY PR  |  |              |
|           | /FORMAT=AVALUE TABLES  |  |              |
|           | /STATISTICS=CHISQ RISK |  |              |
|           | /CELLS=COUNT COLUMN    |  |              |
|           | /COUNT ROUND CELL.     |  |              |
| Resources | Processor Time         |  | 00:00:00,016 |
|           | Elapsed Time           |  | 00:00:00,016 |
|           | Dimensions Requested   |  | 2            |
|           | Cells Available        |  | 174762       |

[DataSet1] C:\Users\evasquez\Documents\2016\Mastologia\NRI.sav

**menopausia = 0**

**Case Processing Summary<sup>a</sup>**

|              | Cases |         |         |         |       |         |
|--------------|-------|---------|---------|---------|-------|---------|
|              | Valid |         | Missing |         | Total |         |
|              | N     | Percent | N       | Percent | N     | Percent |
| RECNL R * PR | 174   | 100,0%  | 0       | ,0%     | 174   | 100,0%  |

a. menopausia = 0

**RECNL R \* PR Crosstabulation<sup>a</sup>**

|         |   |             | PR    |       | Total |
|---------|---|-------------|-------|-------|-------|
|         |   |             | 0     | 1     |       |
| RECNL R | 1 | Count       | 111   | 47    | 158   |
|         |   | % within PR | 92,5% | 87,0% | 90,8% |
|         | 2 | Count       | 9     | 7     | 16    |
|         |   | % within PR | 7,5%  | 13,0% | 9,2%  |
| Total   |   | Count       | 120   | 54    | 174   |

|  |             |        |        |        |
|--|-------------|--------|--------|--------|
|  | % within PR | 100,0% | 100,0% | 100,0% |
|--|-------------|--------|--------|--------|

a. menopausia = 0

**Chi-Square Tests<sup>c</sup>**

|                                    | Value              | df | Asymp. Sig. (2-sided) | Exact Sig. (2-sided) | Exact Sig. (1-sided) |
|------------------------------------|--------------------|----|-----------------------|----------------------|----------------------|
| Pearson Chi-Square                 | 1,331 <sup>a</sup> | 1  | ,249                  |                      |                      |
| Continuity Correction <sup>b</sup> | ,757               | 1  | ,384                  |                      |                      |
| Likelihood Ratio                   | 1,262              | 1  | ,261                  |                      |                      |
| Fisher's Exact Test                |                    |    |                       | ,265                 | ,190                 |
| N of Valid Cases                   | 174                |    |                       |                      |                      |

a. 1 cells (25,0%) have expected count less than 5. The minimum expected count is 4,97.

b. Computed only for a 2x2 table

c. menopausia = 0

**Risk Estimate<sup>a</sup>**

|                               | Value | 95% Confidence Interval |       |
|-------------------------------|-------|-------------------------|-------|
|                               |       | Lower                   | Upper |
| Odds Ratio for RECNLR (1 / 2) | 1,837 | ,646                    | 5,223 |
| For cohort PR = 0             | 1,249 | ,801                    | 1,947 |
| For cohort PR = 1             | ,680  | ,371                    | 1,245 |
| N of Valid Cases              | 174   |                         |       |

a. menopausia = 0

**menopausia = 1**

**Case Processing Summary<sup>a</sup>**

|             | Cases |         |         |         |       |         |
|-------------|-------|---------|---------|---------|-------|---------|
|             | Valid |         | Missing |         | Total |         |
|             | N     | Percent | N       | Percent | N     | Percent |
| RECNLR * PR | 114   | 100,0%  | 0       | ,0%     | 114   | 100,0%  |

**Case Processing Summary<sup>a</sup>**

|             | Cases |         |         |         |       |         |
|-------------|-------|---------|---------|---------|-------|---------|
|             | Valid |         | Missing |         | Total |         |
|             | N     | Percent | N       | Percent | N     | Percent |
| RECNLN * PR | 114   | 100,0%  | 0       | ,0%     | 114   | 100,0%  |

a. menopausia = 1

**RECNLN \* PR Crosstabulation<sup>a</sup>**

|        |   |             | PR     |        | Total  |
|--------|---|-------------|--------|--------|--------|
|        |   |             | 0      | 1      |        |
| RECNLN | 1 | Count       | 67     | 34     | 101    |
|        |   | % within PR | 84,8%  | 97,1%  | 88,6%  |
|        | 2 | Count       | 12     | 1      | 13     |
|        |   | % within PR | 15,2%  | 2,9%   | 11,4%  |
| Total  |   | Count       | 79     | 35     | 114    |
|        |   | % within PR | 100,0% | 100,0% | 100,0% |

a. menopausia = 1

**Chi-Square Tests<sup>c</sup>**

|                                    | Value              | df | Asymp. Sig. (2-sided) | Exact Sig. (2-sided) | Exact Sig. (1-sided) |
|------------------------------------|--------------------|----|-----------------------|----------------------|----------------------|
| Pearson Chi-Square                 | 3,651 <sup>a</sup> | 1  | ,056                  |                      |                      |
| Continuity Correction <sup>b</sup> | 2,533              | 1  | ,112                  |                      |                      |
| Likelihood Ratio                   | 4,522              | 1  | ,033                  |                      |                      |
| Fisher's Exact Test                |                    |    |                       | ,063                 | ,047                 |
| N of Valid Cases                   | 114                |    |                       |                      |                      |

a. 1 cells (25,0%) have expected count less than 5. The minimum expected count is 3,99.

b. Computed only for a 2x2 table

c. menopausia = 1

**Risk Estimate<sup>a</sup>**

|  | Value | 95% Confidence Interval |       |
|--|-------|-------------------------|-------|
|  |       | Lower                   | Upper |
|  |       |                         |       |



|                               |       |      |        |
|-------------------------------|-------|------|--------|
| Odds Ratio for RECCLR (1 / 2) | ,164  | ,020 | 1,316  |
| For cohort PR = 0             | ,719  | ,583 | ,886   |
| For cohort PR = 1             | 4,376 | ,653 | 29,343 |
| N of Valid Cases              | 114   |      |        |

a. menopausia = 1

```

SORT CASES BY histo.
SPLIT FILE SEPARATE BY histo.
CROSSTABS
  /TABLES=RECCLR BY PR
  /FORMAT=AVALUE TABLES
  /STATISTICS=CHISQ RISK
  /CELLS=COUNT COLUMN
  /COUNT ROUND CELL.

```

## Crosstabs

### Notes

|                        |                           |                                                                                                                                 |
|------------------------|---------------------------|---------------------------------------------------------------------------------------------------------------------------------|
| Output Created         |                           | 25-oct-2016 14:28:36                                                                                                            |
| Comments               |                           |                                                                                                                                 |
| Input                  | Data                      | C:\Users\levasquez\Documents\2016\Wastologia\NRI.sav                                                                            |
|                        | Active Dataset            | DataSet1                                                                                                                        |
|                        | Filter                    | <none>                                                                                                                          |
|                        | Weight                    | <none>                                                                                                                          |
|                        | Split File                | histo                                                                                                                           |
|                        | N of Rows in Working Data | 288                                                                                                                             |
|                        | File                      |                                                                                                                                 |
| Missing Value Handling | Definition of Missing     | User-defined missing values are treated as missing.                                                                             |
|                        | Cases Used                | Statistics for each table are based on all the cases with valid data in the specified range(s) for all variables in each table. |

|           |                        |  |              |
|-----------|------------------------|--|--------------|
| Syntax    | CROSSTABS              |  |              |
|           | /TABLES=RECNLR BY PR   |  |              |
|           | /FORMAT=AVALUE TABLES  |  |              |
|           | /STATISTICS=CHISQ RISK |  |              |
|           | /CELLS=COUNT COLUMN    |  |              |
|           | /COUNT ROUND CELL.     |  |              |
| Resources | Processor Time         |  | 00:00:00,032 |
|           | Elapsed Time           |  | 00:00:00,016 |
|           | Dimensions Requested   |  | 2            |
|           | Cells Available        |  | 174762       |

[DataSet1] C:\Users\evasquez\Documents\2016\Mastologia\NRI.sav

**Warnings**

No measures of association are computed for the crosstabulation of RECNLR \* PR for split file histo= 2. At least one variable in each 2-way table upon which measures of association are computed is a constant.

**histo = 1**

**Case Processing Summary<sup>a</sup>**

|             | Cases |         |         |         |       |         |
|-------------|-------|---------|---------|---------|-------|---------|
|             | Valid |         | Missing |         | Total |         |
|             | N     | Percent | N       | Percent | N     | Percent |
| RECNLR * PR | 274   | 100,0%  | 0       | ,0%     | 274   | 100,0%  |

a. histo = 1

**RECNLR \* PR Crosstabulation<sup>a</sup>**

|  | PR | Total |
|--|----|-------|
|--|----|-------|

|        |   |             | 0      | 1      |        |
|--------|---|-------------|--------|--------|--------|
| RECNLR | 1 | Count       | 170    | 76     | 246    |
|        |   | % within PR | 89,0%  | 91,6%  | 89,8%  |
|        | 2 | Count       | 21     | 7      | 28     |
|        |   | % within PR | 11,0%  | 8,4%   | 10,2%  |
| Total  |   | Count       | 191    | 83     | 274    |
|        |   | % within PR | 100,0% | 100,0% | 100,0% |

a. histo = 1

#### Chi-Square Tests<sup>c</sup>

|                                    | Value             | df | Asymp. Sig. (2-sided) | Exact Sig. (2-sided) | Exact Sig. (1-sided) |
|------------------------------------|-------------------|----|-----------------------|----------------------|----------------------|
| Pearson Chi-Square                 | ,414 <sup>a</sup> | 1  | ,520                  |                      |                      |
| Continuity Correction <sup>b</sup> | ,182              | 1  | ,670                  |                      |                      |
| Likelihood Ratio                   | ,427              | 1  | ,513                  |                      |                      |
| Fisher's Exact Test                |                   |    |                       | ,665                 | ,342                 |
| N of Valid Cases                   | 274               |    |                       |                      |                      |

a. 0 cells (,0%) have expected count less than 5. The minimum expected count is 8,48.

b. Computed only for a 2x2 table

c. histo = 1

#### Risk Estimate<sup>a</sup>

|                               | Value | 95% Confidence Interval |       |
|-------------------------------|-------|-------------------------|-------|
|                               |       | Lower                   | Upper |
| Odds Ratio for RECNLR (1 / 2) | ,746  | ,304                    | 1,829 |
| For cohort PR = 0             | ,921  | ,732                    | 1,159 |
| For cohort PR = 1             | 1,236 | ,633                    | 2,411 |
| N of Valid Cases              | 274   |                         |       |

a. histo = 1

**histo = 2**

**Case Processing Summary<sup>a</sup>**

|             | Cases |         |         |         |       |         |
|-------------|-------|---------|---------|---------|-------|---------|
|             | Valid |         | Missing |         | Total |         |
|             | N     | Percent | N       | Percent | N     | Percent |
| RECCLR * PR | 6     | 100,0%  | 0       | ,0%     | 6     | 100,0%  |

a. histo = 2

**RECCLR \* PR Crosstabulation<sup>a</sup>**

|          |             |        | PR     |        | Total |
|----------|-------------|--------|--------|--------|-------|
|          |             |        | 0      | 1      |       |
| RECCLR 1 | Count       | 5      | 1      | 6      |       |
|          | % within PR | 100,0% | 100,0% | 100,0% |       |
| Total    | Count       | 5      | 1      | 6      |       |
|          | % within PR | 100,0% | 100,0% | 100,0% |       |

a. histo = 2

**Chi-Square Tests<sup>b</sup>**

|                    | Value          |
|--------------------|----------------|
| Pearson Chi-Square | . <sup>a</sup> |
| N of Valid Cases   | 6              |

a. No statistics are computed because RECCLR is a constant.

b. histo = 2

**Risk Estimate<sup>b</sup>**

|                                       | Value          |
|---------------------------------------|----------------|
| Odds Ratio for RECCLR (1 /<br>yyyyyy) | . <sup>a</sup> |

a. No statistics are computed because RECCLR is a constant.

b. histo = 2

histo = 3

Case Processing Summary<sup>a</sup>

|             | Cases |         |         |         |       |         |
|-------------|-------|---------|---------|---------|-------|---------|
|             | Valid |         | Missing |         | Total |         |
|             | N     | Percent | N       | Percent | N     | Percent |
| RECNLN * PR | 8     | 100,0%  | 0       | ,0%     | 8     | 100,0%  |

a. histo = 3

RECNLN \* PR Crosstabulation<sup>a</sup>

|        |   |             | PR     |        | Total  |
|--------|---|-------------|--------|--------|--------|
|        |   |             | 0      | 1      |        |
| RECNLN | 1 | Count       | 3      | 4      | 7      |
|        |   | % within PR | 100,0% | 80,0%  | 87,5%  |
|        | 2 | Count       | 0      | 1      | 1      |
|        |   | % within PR | ,0%    | 20,0%  | 12,5%  |
| Total  |   | Count       | 3      | 5      | 8      |
|        |   | % within PR | 100,0% | 100,0% | 100,0% |

a. histo = 3

Chi-Square Tests<sup>c</sup>

|                                    | Value             | df | Asymp. Sig. (2-sided) | Exact Sig. (2-sided) | Exact Sig. (1-sided) |
|------------------------------------|-------------------|----|-----------------------|----------------------|----------------------|
| Pearson Chi-Square                 | ,686 <sup>a</sup> | 1  | ,408                  |                      |                      |
| Continuity Correction <sup>b</sup> | ,000              | 1  | 1,000                 |                      |                      |
| Likelihood Ratio                   | 1,024             | 1  | ,312                  |                      |                      |
| Fisher's Exact Test                |                   |    |                       | 1,000                | ,625                 |
| N of Valid Cases                   | 8                 |    |                       |                      |                      |

a. 4 cells (100,0%) have expected count less than 5. The minimum expected count is ,38.

b. Computed only for a 2x2 table

c. histo = 3

**Risk Estimate<sup>a</sup>**

|                   | Value | 95% Confidence Interval |       |
|-------------------|-------|-------------------------|-------|
|                   |       | Lower                   | Upper |
| For cohort PR = 1 | ,571  | ,301                    | 1,085 |
| N of Valid Cases  | 8     |                         |       |

a. histo = 3

```

SORT CASES BY grado.
SPLIT FILE SEPARATE BY grado.
CROSSTABS
  /TABLES=RECCLR BY PR
  /FORMAT=AVALUE TABLES
  /STATISTICS=CHISQ RISK
  /CELLS=COUNT COLUMN
  /COUNT ROUND CELL.

```

**Crosstabs**

**Notes**

|                        |                           |                                                     |
|------------------------|---------------------------|-----------------------------------------------------|
| Output Created         |                           | 25-oct-2016 14:29:00                                |
| Comments               |                           |                                                     |
| Input                  | Data                      | C:\Users\levasquez\Documents\2016\Matologia\NRI.sav |
|                        | Active Dataset            | DataSet1                                            |
|                        | Filter                    | <none>                                              |
|                        | Weight                    | <none>                                              |
|                        | Split File                | grado                                               |
|                        | N of Rows in Working Data | 288                                                 |
|                        | File                      |                                                     |
| Missing Value Handling | Definition of Missing     | User-defined missing values are treated as missing. |

|           |                      |                                                                                                                                   |
|-----------|----------------------|-----------------------------------------------------------------------------------------------------------------------------------|
| Syntax    | Cases Used           | Statistics for each table are based on all the cases with valid data in the specified range(s) for all variables in each table.   |
|           |                      | CROSSTABS<br>/TABLES=RECNLR BY PR<br>/FORMAT=AVALUE TABLES<br>/STATISTICS=CHISQ RISK<br>/CELLS=COUNT COLUMN<br>/COUNT ROUND CELL. |
| Resources | Processor Time       | 00:00:00,015                                                                                                                      |
|           | Elapsed Time         | 00:00:00,017                                                                                                                      |
|           | Dimensions Requested | 2                                                                                                                                 |
|           | Cells Available      | 174762                                                                                                                            |

[DataSet1] C:\Users\evasquez\Documents\2016\Mastologia\NRI.sav

### Warnings

No measures of association are computed for the crosstabulation of RECNLR \* PR for split file grado= 1. At least one variable in each 2-way table upon which measures of association are computed is a constant.

**grado = 0**

### Case Processing Summary<sup>a</sup>

|             | Cases |         |         |         |       |         |
|-------------|-------|---------|---------|---------|-------|---------|
|             | Valid |         | Missing |         | Total |         |
|             | N     | Percent | N       | Percent | N     | Percent |
| RECNLR * PR | 20    | 100,0%  | 0       | ,0%     | 20    | 100,0%  |

a. grado = 0

**RECNLN \* PR Crosstabulation<sup>a</sup>**

|        |   |             | PR     |        | Total  |
|--------|---|-------------|--------|--------|--------|
|        |   |             | 0      | 1      |        |
| RECNLN | 1 | Count       | 12     | 7      | 19     |
|        |   | % within PR | 100,0% | 87,5%  | 95,0%  |
|        | 2 | Count       | 0      | 1      | 1      |
|        |   | % within PR | ,0%    | 12,5%  | 5,0%   |
| Total  |   | Count       | 12     | 8      | 20     |
|        |   | % within PR | 100,0% | 100,0% | 100,0% |

a. grado = 0

**Chi-Square Tests<sup>c</sup>**

|                                    | Value              | df | Asymp. Sig. (2-sided) | Exact Sig. (2-sided) | Exact Sig. (1-sided) |
|------------------------------------|--------------------|----|-----------------------|----------------------|----------------------|
| Pearson Chi-Square                 | 1,579 <sup>a</sup> | 1  | ,209                  |                      |                      |
| Continuity Correction <sup>b</sup> | ,044               | 1  | ,834                  |                      |                      |
| Likelihood Ratio                   | 1,912              | 1  | ,167                  |                      |                      |
| Fisher's Exact Test                |                    |    |                       | ,400                 | ,400                 |
| N of Valid Cases                   | 20                 |    |                       |                      |                      |

a. 2 cells (50,0%) have expected count less than 5. The minimum expected count is ,40.

b. Computed only for a 2x2 table

c. grado = 0

**Risk Estimate<sup>a</sup>**

|                   | Value | 95% Confidence Interval |       |
|-------------------|-------|-------------------------|-------|
|                   |       | Lower                   | Upper |
| For cohort PR = 1 | ,368  | ,204                    | ,664  |
| N of Valid Cases  | 20    |                         |       |

a. grado = 0

**grado = 1**



**Case Processing Summary<sup>a</sup>**

|             | Cases |         |         |         |       |         |
|-------------|-------|---------|---------|---------|-------|---------|
|             | Valid |         | Missing |         | Total |         |
|             | N     | Percent | N       | Percent | N     | Percent |
| RECCLR * PR | 21    | 100,0%  | 0       | ,0%     | 21    | 100,0%  |

a. grado = 1

**RECCLR \* PR Crosstabulation<sup>a</sup>**

|        |             |             | PR     | Total |
|--------|-------------|-------------|--------|-------|
|        |             |             | 0      |       |
| RECCLR | 1           | Count       | 20     | 20    |
|        |             | % within PR | 95,2%  | 95,2% |
| 2      | Count       | 1           | 1      |       |
|        | % within PR | 4,8%        | 4,8%   |       |
| Total  | Count       | 21          | 21     |       |
|        | % within PR | 100,0%      | 100,0% |       |

a. grado = 1

**Chi-Square Tests<sup>b</sup>**

|                    | Value          |
|--------------------|----------------|
| Pearson Chi-Square | . <sup>a</sup> |
| N of Valid Cases   | 21             |

a. No statistics are computed because PR is a constant.

b. grado = 1

**Risk Estimate<sup>b</sup>**

|                               | Value          |
|-------------------------------|----------------|
| Odds Ratio for RECCLR (1 / 2) | . <sup>a</sup> |

a. No statistics are computed because PR is a constant.

**Risk Estimate<sup>b</sup>**

|                               |                |
|-------------------------------|----------------|
|                               | Value          |
| Odds Ratio for RECNLR (1 / 2) | . <sup>a</sup> |

a. No statistics are computed because PR is a constant.

b. grado = 1

**grado = 2**

**Case Processing Summary<sup>a</sup>**

|             | Cases |         |         |         |       |         |
|-------------|-------|---------|---------|---------|-------|---------|
|             | Valid |         | Missing |         | Total |         |
|             | N     | Percent | N       | Percent | N     | Percent |
| RECNLR * PR | 131   | 100,0%  | 0       | ,0%     | 131   | 100,0%  |

a. grado = 2

**RECNLR \* PR Crosstabulation<sup>a</sup>**

|          |             |        | PR     |        | Total |
|----------|-------------|--------|--------|--------|-------|
|          |             |        | 0      | 1      |       |
| RECNLR 1 | Count       | 84     | 34     | 118    |       |
|          | % within PR | 91,3%  | 87,2%  | 90,1%  |       |
| 2        | Count       | 8      | 5      | 13     |       |
|          | % within PR | 8,7%   | 12,8%  | 9,9%   |       |
| Total    | Count       | 92     | 39     | 131    |       |
|          | % within PR | 100,0% | 100,0% | 100,0% |       |

a. grado = 2

**Chi-Square Tests<sup>c</sup>**

|  | Value | df | Asymp. Sig. (2-sided) | Exact Sig. (2-sided) | Exact Sig. (1-sided) |
|--|-------|----|-----------------------|----------------------|----------------------|
|--|-------|----|-----------------------|----------------------|----------------------|

|                                    |                   |   |      |      |      |
|------------------------------------|-------------------|---|------|------|------|
| Pearson Chi-Square                 | ,521 <sup>a</sup> | 1 | ,470 |      |      |
| Continuity Correction <sup>b</sup> | ,162              | 1 | ,687 |      |      |
| Likelihood Ratio                   | ,500              | 1 | ,480 |      |      |
| Fisher's Exact Test                |                   |   |      | ,527 | ,333 |
| N of Valid Cases                   | 131               |   |      |      |      |

a. 1 cells (25,0%) have expected count less than 5. The minimum expected count is 3,87.

b. Computed only for a 2x2 table

c. grado = 2

#### Risk Estimate<sup>a</sup>

|                               | Value | 95% Confidence Interval |       |
|-------------------------------|-------|-------------------------|-------|
|                               |       | Lower                   | Upper |
| Odds Ratio for RECCLR (1 / 2) | 1,544 | ,472                    | 5,057 |
| For cohort PR = 0             | 1,157 | ,741                    | 1,805 |
| For cohort PR = 1             | ,749  | ,356                    | 1,576 |
| N of Valid Cases              | 131   |                         |       |

a. grado = 2

**grado = 3**

#### Case Processing Summary<sup>a</sup>

|             | Cases |         |         |         |       |         |
|-------------|-------|---------|---------|---------|-------|---------|
|             | Valid |         | Missing |         | Total |         |
|             | N     | Percent | N       | Percent | N     | Percent |
| RECCLR * PR | 116   | 100,0%  | 0       | ,0%     | 116   | 100,0%  |

a. grado = 3

#### RECCLR \* PR Crosstabulation<sup>a</sup>

|                | PR | Total |     |
|----------------|----|-------|-----|
|                |    |       | 0   |
| RECCLR 1 Count | 62 | 40    | 102 |

|       |             |        |        |        |
|-------|-------------|--------|--------|--------|
|       | % within PR | 83,8%  | 95,2%  | 87,9%  |
| 2     | Count       | 12     | 2      | 14     |
|       | % within PR | 16,2%  | 4,8%   | 12,1%  |
| Total | Count       | 74     | 42     | 116    |
|       | % within PR | 100,0% | 100,0% | 100,0% |

a. grado = 3

#### Chi-Square Tests<sup>c</sup>

|                                    | Value              | df | Asymp. Sig. (2-sided) | Exact Sig. (2-sided) | Exact Sig. (1-sided) |
|------------------------------------|--------------------|----|-----------------------|----------------------|----------------------|
| Pearson Chi-Square                 | 3,312 <sup>a</sup> | 1  | ,069                  |                      |                      |
| Continuity Correction <sup>b</sup> | 2,321              | 1  | ,128                  |                      |                      |
| Likelihood Ratio                   | 3,764              | 1  | ,052                  |                      |                      |
| Fisher's Exact Test                |                    |    |                       | ,081                 | ,059                 |
| N of Valid Cases                   | 116                |    |                       |                      |                      |

a. 0 cells (,0%) have expected count less than 5. The minimum expected count is 5,07.

b. Computed only for a 2x2 table

c. grado = 3

#### Risk Estimate<sup>a</sup>

|                               | Value | 95% Confidence Interval |        |
|-------------------------------|-------|-------------------------|--------|
|                               |       | Lower                   | Upper  |
| Odds Ratio for RECCLR (1 / 2) | ,258  | ,055                    | 1,216  |
| For cohort PR = 0             | ,709  | ,544                    | ,924   |
| For cohort PR = 1             | 2,745 | ,744                    | 10,130 |
| N of Valid Cases              | 116   |                         |        |

a. grado = 3

SORT CASES BY ILV.  
 SPLIT FILE SEPARATE BY ILV.  
 CROSSTABS

/TABLES=RECCLR BY PR  
 /FORMAT=AVALUE TABLES  
 /STATISTICS=CHISQ RISK  
 /CELLS=COUNT COLUMN  
 /COUNT ROUND CELL.

## Crosstabs

### Notes

|                        |                           |                                                                                                                                   |
|------------------------|---------------------------|-----------------------------------------------------------------------------------------------------------------------------------|
| Output Created         |                           | 25-oct-2016 14:29:22                                                                                                              |
| Comments               |                           |                                                                                                                                   |
| Input                  | Data                      | C:\Users\evasquez\Documents\2016\Mastologia\NRI.sav                                                                               |
|                        | Active Dataset            | DataSet1                                                                                                                          |
|                        | Filter                    | <none>                                                                                                                            |
|                        | Weight                    | <none>                                                                                                                            |
|                        | Split File                | ILV                                                                                                                               |
|                        | N of Rows in Working Data | 288                                                                                                                               |
|                        | File                      |                                                                                                                                   |
| Missing Value Handling | Definition of Missing     | User-defined missing values are treated as missing.                                                                               |
|                        | Cases Used                | Statistics for each table are based on all the cases with valid data in the specified range(s) for all variables in each table.   |
| Syntax                 |                           | CROSSTABS<br>/TABLES=RECNLR BY PR<br>/FORMAT=AVALUE TABLES<br>/STATISTICS=CHISQ RISK<br>/CELLS=COUNT COLUMN<br>/COUNT ROUND CELL. |
| Resources              | Processor Time            | 00:00:00,016                                                                                                                      |
|                        | Elapsed Time              | 00:00:00,016                                                                                                                      |
|                        | Dimensions Requested      | 2                                                                                                                                 |
|                        | Cells Available           | 174762                                                                                                                            |

[DataSet1] C:\Users\evasquez\Documents\2016\Mastologia\NRI.sav

ILV = 0

**Case Processing Summary<sup>a</sup>**

|             | Cases |         |         |         |       |         |
|-------------|-------|---------|---------|---------|-------|---------|
|             | Valid |         | Missing |         | Total |         |
|             | N     | Percent | N       | Percent | N     | Percent |
| RECNLN * PR | 98    | 100,0%  | 0       | ,0%     | 98    | 100,0%  |

a. ILV = 0

**RECNLN \* PR Crosstabulation<sup>a</sup>**

|        |   |             | PR     |        | Total  |
|--------|---|-------------|--------|--------|--------|
|        |   |             | 0      | 1      |        |
| RECNLN | 1 | Count       | 73     | 16     | 89     |
|        |   | % within PR | 91,3%  | 88,9%  | 90,8%  |
|        | 2 | Count       | 7      | 2      | 9      |
|        |   | % within PR | 8,8%   | 11,1%  | 9,2%   |
| Total  |   | Count       | 80     | 18     | 98     |
|        |   | % within PR | 100,0% | 100,0% | 100,0% |

a. ILV = 0

**Chi-Square Tests<sup>c</sup>**

|                                    | Value             | df | Asymp. Sig. (2-sided) | Exact Sig. (2-sided) | Exact Sig. (1-sided) |
|------------------------------------|-------------------|----|-----------------------|----------------------|----------------------|
| Pearson Chi-Square                 | ,098 <sup>a</sup> | 1  | ,754                  |                      |                      |
| Continuity Correction <sup>b</sup> | ,000              | 1  | 1,000                 |                      |                      |
| Likelihood Ratio                   | ,094              | 1  | ,759                  |                      |                      |
| Fisher's Exact Test                |                   |    |                       | ,668                 | ,521                 |
| N of Valid Cases                   | 98                |    |                       |                      |                      |

a. 1 cells (25,0%) have expected count less than 5. The minimum expected count is 1,65.

b. Computed only for a 2x2 table

**Chi-Square Tests<sup>c</sup>**

|                                    | Value             | df | Asymp. Sig. (2-sided) | Exact Sig. (2-sided) | Exact Sig. (1-sided) |
|------------------------------------|-------------------|----|-----------------------|----------------------|----------------------|
| Pearson Chi-Square                 | ,098 <sup>a</sup> | 1  | ,754                  |                      |                      |
| Continuity Correction <sup>b</sup> | ,000              | 1  | 1,000                 |                      |                      |
| Likelihood Ratio                   | ,094              | 1  | ,759                  |                      |                      |
| Fisher's Exact Test                |                   |    |                       | ,668                 | ,521                 |
| N of Valid Cases                   | 98                |    |                       |                      |                      |

a. 1 cells (25,0%) have expected count less than 5. The minimum expected count is 1,65.

b. Computed only for a 2x2 table

c. ILV = 0

**Risk Estimate<sup>a</sup>**

|                               | Value | 95% Confidence Interval |       |
|-------------------------------|-------|-------------------------|-------|
|                               |       | Lower                   | Upper |
| Odds Ratio for RECCLR (1 / 2) | 1,304 | ,247                    | 6,870 |
| For cohort PR = 0             | 1,055 | ,734                    | 1,515 |
| For cohort PR = 1             | ,809  | ,220                    | 2,969 |
| N of Valid Cases              | 98    |                         |       |

a. ILV = 0

**ILV = 1**

**Case Processing Summary<sup>a</sup>**

|             | Cases |         |         |         |       |         |
|-------------|-------|---------|---------|---------|-------|---------|
|             | Valid |         | Missing |         | Total |         |
|             | N     | Percent | N       | Percent | N     | Percent |
| RECCLR * PR | 90    | 100,0%  | 0       | ,0%     | 90    | 100,0%  |

a. ILV = 1

**RECCLR \* PR Crosstabulation<sup>a</sup>**

|        |   |             | PR     |        | Total  |
|--------|---|-------------|--------|--------|--------|
|        |   |             | 0      | 1      |        |
| RECNLR | 1 | Count       | 65     | 17     | 82     |
|        |   | % within PR | 90,3%  | 94,4%  | 91,1%  |
|        | 2 | Count       | 7      | 1      | 8      |
|        |   | % within PR | 9,7%   | 5,6%   | 8,9%   |
| Total  |   | Count       | 72     | 18     | 90     |
|        |   | % within PR | 100,0% | 100,0% | 100,0% |

a. ILV = 1

#### Chi-Square Tests<sup>c</sup>

|                                    | Value             | df | Asymp. Sig. (2-sided) | Exact Sig. (2-sided) | Exact Sig. (1-sided) |
|------------------------------------|-------------------|----|-----------------------|----------------------|----------------------|
| Pearson Chi-Square                 | ,309 <sup>a</sup> | 1  | ,578                  |                      |                      |
| Continuity Correction <sup>b</sup> | ,009              | 1  | ,926                  |                      |                      |
| Likelihood Ratio                   | ,342              | 1  | ,559                  |                      |                      |
| Fisher's Exact Test                |                   |    |                       | 1,000                | ,496                 |
| N of Valid Cases                   | 90                |    |                       |                      |                      |

a. 1 cells (25,0%) have expected count less than 5. The minimum expected count is 1,60.

b. Computed only for a 2x2 table

c. ILV = 1

#### Risk Estimate<sup>a</sup>

|                               | Value | 95% Confidence Interval |        |
|-------------------------------|-------|-------------------------|--------|
|                               |       | Lower                   | Upper  |
| Odds Ratio for RECNLR (1 / 2) | ,546  | ,063                    | 4,747  |
| For cohort PR = 0             | ,906  | ,682                    | 1,204  |
| For cohort PR = 1             | 1,659 | ,253                    | 10,887 |
| N of Valid Cases              | 90    |                         |        |

a. ILV = 1

**ILV = 2**



**Case Processing Summary<sup>a</sup>**

|             | Cases |         |         |         |       |         |
|-------------|-------|---------|---------|---------|-------|---------|
|             | Valid |         | Missing |         | Total |         |
|             | N     | Percent | N       | Percent | N     | Percent |
| RECCLR * PR | 100   | 100,0%  | 0       | ,0%     | 100   | 100,0%  |

a. ILV = 2

**RECCLR \* PR Crosstabulation<sup>a</sup>**

|        |   |             | PR     |        | Total  |
|--------|---|-------------|--------|--------|--------|
|        |   |             | 0      | 1      |        |
| RECCLR | 1 | Count       | 40     | 48     | 88     |
|        |   | % within PR | 85,1%  | 90,6%  | 88,0%  |
|        | 2 | Count       | 7      | 5      | 12     |
|        |   | % within PR | 14,9%  | 9,4%   | 12,0%  |
| Total  |   | Count       | 47     | 53     | 100    |
|        |   | % within PR | 100,0% | 100,0% | 100,0% |

a. ILV = 2

**Chi-Square Tests<sup>c</sup>**

|                                    | Value             | df | Asymp. Sig. (2-sided) | Exact Sig. (2-sided) | Exact Sig. (1-sided) |
|------------------------------------|-------------------|----|-----------------------|----------------------|----------------------|
| Pearson Chi-Square                 | ,703 <sup>a</sup> | 1  | ,402                  |                      |                      |
| Continuity Correction <sup>b</sup> | ,281              | 1  | ,596                  |                      |                      |
| Likelihood Ratio                   | ,703              | 1  | ,402                  |                      |                      |
| Fisher's Exact Test                |                   |    |                       | ,540                 | ,298                 |
| N of Valid Cases                   | 100               |    |                       |                      |                      |

a. 0 cells (.0%) have expected count less than 5. The minimum expected count is 5,64.

b. Computed only for a 2x2 table

c. ILV = 2

**Risk Estimate<sup>a</sup>**

|                               | Value | 95% Confidence Interval |       |
|-------------------------------|-------|-------------------------|-------|
|                               |       | Lower                   | Upper |
| Odds Ratio for RECNLR (1 / 2) | ,595  | ,175                    | 2,020 |
| For cohort PR = 0             | ,779  | ,459                    | 1,324 |
| For cohort PR = 1             | 1,309 | ,653                    | 2,626 |
| N of Valid Cases              | 100   |                         |       |

a. ILV = 2

```

SORT CASES BY RE.
SPLIT FILE SEPARATE BY RE.
CROSSTABS
  /TABLES=RECNLR BY PR
  /FORMAT=AVALUE TABLES
  /STATISTICS=CHISQ RISK
  /CELLS=COUNT COLUMN
  /COUNT ROUND CELL.

```

## Crosstabs

### Notes

|                        |                           |                                                      |
|------------------------|---------------------------|------------------------------------------------------|
| Output Created         |                           | 25-oct-2016 14:29:46                                 |
| Comments               |                           |                                                      |
| Input                  | Data                      | C:\Users\levasquez\Documents\2016\Wastologia\NRI.sav |
|                        | Active Dataset            | DataSet1                                             |
|                        | Filter                    | <none>                                               |
|                        | Weight                    | <none>                                               |
|                        | Split File                | RE                                                   |
|                        | N of Rows in Working Data | 288                                                  |
|                        | File                      |                                                      |
| Missing Value Handling | Definition of Missing     | User-defined missing values are treated as missing.  |

|           |                      |                                                                                                                                   |
|-----------|----------------------|-----------------------------------------------------------------------------------------------------------------------------------|
| Syntax    | Cases Used           | Statistics for each table are based on all the cases with valid data in the specified range(s) for all variables in each table.   |
|           |                      | CROSSTABS<br>/TABLES=RECNLR BY PR<br>/FORMAT=AVALUE TABLES<br>/STATISTICS=CHISQ RISK<br>/CELLS=COUNT COLUMN<br>/COUNT ROUND CELL. |
| Resources | Processor Time       | 00:00:00,016                                                                                                                      |
|           | Elapsed Time         | 00:00:00,015                                                                                                                      |
|           | Dimensions Requested | 2                                                                                                                                 |
|           | Cells Available      | 174762                                                                                                                            |

[DataSet1] C:\Users\evasquez\Documents\2016\Mastologia\NRI.sav

**RE = 0**

**Case Processing Summary<sup>a</sup>**

|             | Cases |         |         |         |       |         |
|-------------|-------|---------|---------|---------|-------|---------|
|             | Valid |         | Missing |         | Total |         |
|             | N     | Percent | N       | Percent | N     | Percent |
| RECNLR * PR | 110   | 100,0%  | 0       | ,0%     | 110   | 100,0%  |

a. RE = 0

**RECNLR \* PR Crosstabulation<sup>a</sup>**

|        |   |             | PR    |       | Total |
|--------|---|-------------|-------|-------|-------|
|        |   |             | 0     | 1     |       |
| RECNLR | 1 | Count       | 49    | 46    | 95    |
|        |   | % within PR | 83,1% | 90,2% | 86,4% |

|       |             |        |        |        |
|-------|-------------|--------|--------|--------|
| 2     | Count       | 10     | 5      | 15     |
|       | % within PR | 16,9%  | 9,8%   | 13,6%  |
| Total | Count       | 59     | 51     | 110    |
|       | % within PR | 100,0% | 100,0% | 100,0% |

a. RE = 0

**Chi-Square Tests<sup>c</sup>**

|                                    | Value              | df | Asymp. Sig. (2-sided) | Exact Sig. (2-sided) | Exact Sig. (1-sided) |
|------------------------------------|--------------------|----|-----------------------|----------------------|----------------------|
| Pearson Chi-Square                 | 1,186 <sup>a</sup> | 1  | ,276                  |                      |                      |
| Continuity Correction <sup>b</sup> | ,657               | 1  | ,418                  |                      |                      |
| Likelihood Ratio                   | 1,211              | 1  | ,271                  |                      |                      |
| Fisher's Exact Test                |                    |    |                       | ,404                 | ,210                 |
| N of Valid Cases                   | 110                |    |                       |                      |                      |

a. 0 cells (,0%) have expected count less than 5. The minimum expected count is 6,95.

b. Computed only for a 2x2 table

c. RE = 0

**Risk Estimate<sup>a</sup>**

|                               | Value | 95% Confidence Interval |       |
|-------------------------------|-------|-------------------------|-------|
|                               |       | Lower                   | Upper |
| Odds Ratio for RECNLR (1 / 2) | ,533  | ,169                    | 1,676 |
| For cohort PR = 0             | ,774  | ,515                    | 1,163 |
| For cohort PR = 1             | 1,453 | ,690                    | 3,060 |
| N of Valid Cases              | 110   |                         |       |

a. RE = 0

**RE = 1**

**Case Processing Summary<sup>a</sup>**

|  |       |
|--|-------|
|  | Cases |
|--|-------|

|             | Valid |         | Missing |         | Total |         |
|-------------|-------|---------|---------|---------|-------|---------|
|             | N     | Percent | N       | Percent | N     | Percent |
| RECCLR * PR | 178   | 100,0%  | 0       | ,0%     | 178   | 100,0%  |

a. RE = 1

#### RECCLR \* PR Crosstabulation<sup>a</sup>

|        |   |             | PR     |        | Total  |
|--------|---|-------------|--------|--------|--------|
|        |   |             | 0      | 1      |        |
| RECCLR | 1 | Count       | 129    | 35     | 164    |
|        |   | % within PR | 92,1%  | 92,1%  | 92,1%  |
|        | 2 | Count       | 11     | 3      | 14     |
|        |   | % within PR | 7,9%   | 7,9%   | 7,9%   |
| Total  |   | Count       | 140    | 38     | 178    |
|        |   | % within PR | 100,0% | 100,0% | 100,0% |

a. RE = 1

#### Chi-Square Tests<sup>c</sup>

|                                    | Value             | df | Asymp. Sig. (2-sided) | Exact Sig. (2-sided) | Exact Sig. (1-sided) |
|------------------------------------|-------------------|----|-----------------------|----------------------|----------------------|
| Pearson Chi-Square                 | ,000 <sup>a</sup> | 1  | ,994                  |                      |                      |
| Continuity Correction <sup>b</sup> | ,000              | 1  | 1,000                 |                      |                      |
| Likelihood Ratio                   | ,000              | 1  | ,994                  |                      |                      |
| Fisher's Exact Test                |                   |    |                       | 1,000                | ,609                 |
| N of Valid Cases                   | 178               |    |                       |                      |                      |

a. 1 cells (25,0%) have expected count less than 5. The minimum expected count is 2,99.

b. Computed only for a 2x2 table

c. RE = 1

#### Risk Estimate<sup>a</sup>

|  | Value | 95% Confidence Interval       |       |
|--|-------|-------------------------------|-------|
|  |       | Lower                         | Upper |
|  |       | Odds Ratio for RECCLR (1 / 2) | 1,005 |

|                   |       |      |       |
|-------------------|-------|------|-------|
| For cohort PR = 0 | 1,001 | ,753 | 1,331 |
| For cohort PR = 1 | ,996  | ,350 | 2,832 |
| N of Valid Cases  | 178   |      |       |

a. RE = 1

```

SORT CASES BY IMC2.
SPLIT FILE SEPARATE BY IMC2.
CROSSTABS
  /TABLES=RECCLR BY PR
  /FORMAT=AVALUE TABLES
  /STATISTICS=CHISQ RISK
  /CELLS=COUNT COLUMN
  /COUNT ROUND CELL.

```

## Crosstabs

### Notes

|                        |                           |                                                                                                                                 |
|------------------------|---------------------------|---------------------------------------------------------------------------------------------------------------------------------|
| Output Created         |                           | 25-oct-2016 14:31:09                                                                                                            |
| Comments               |                           |                                                                                                                                 |
| Input                  | Data                      | C:\Users\levasquez\Documents\2016\Matologia\NRI.sav                                                                             |
|                        | Active Dataset            | DataSet1                                                                                                                        |
|                        | Filter                    | <none>                                                                                                                          |
|                        | Weight                    | <none>                                                                                                                          |
|                        | Split File                | IMC2                                                                                                                            |
|                        | N of Rows in Working Data | 288                                                                                                                             |
|                        | File                      |                                                                                                                                 |
| Missing Value Handling | Definition of Missing     | User-defined missing values are treated as missing.                                                                             |
|                        | Cases Used                | Statistics for each table are based on all the cases with valid data in the specified range(s) for all variables in each table. |

|           |                        |  |              |
|-----------|------------------------|--|--------------|
| Syntax    | CROSSTABS              |  |              |
|           | /TABLES=RECNL R BY PR  |  |              |
|           | /FORMAT=AVALUE TABLES  |  |              |
|           | /STATISTICS=CHISQ RISK |  |              |
|           | /CELLS=COUNT COLUMN    |  |              |
|           | /COUNT ROUND CELL.     |  |              |
| Resources | Processor Time         |  | 00:00:00,000 |
|           | Elapsed Time           |  | 00:00:00,000 |
|           | Dimensions Requested   |  | 2            |
|           | Cells Available        |  | 174762       |

[DataSet1] C:\Users\evasquez\Documents\2016\Mastologia\NRI.sav

**IMC2 = 1**

**Case Processing Summary<sup>a</sup>**

|              | Cases |         |         |         |       |         |
|--------------|-------|---------|---------|---------|-------|---------|
|              | Valid |         | Missing |         | Total |         |
|              | N     | Percent | N       | Percent | N     | Percent |
| RECNL R * PR | 6     | 100,0%  | 0       | ,0%     | 6     | 100,0%  |

a. IMC2 = 1

**RECNL R \* PR Crosstabulation<sup>a</sup>**

|         |   |             | PR    |       | Total |
|---------|---|-------------|-------|-------|-------|
|         |   |             | 0     | 1     |       |
| RECNL R | 1 | Count       | 2     | 2     | 4     |
|         |   | % within PR | 66,7% | 66,7% | 66,7% |
|         | 2 | Count       | 1     | 1     | 2     |
|         |   | % within PR | 33,3% | 33,3% | 33,3% |
| Total   |   | Count       | 3     | 3     | 6     |

|  |             |        |        |        |
|--|-------------|--------|--------|--------|
|  | % within PR | 100,0% | 100,0% | 100,0% |
|--|-------------|--------|--------|--------|

a. IMC2 = 1

**Chi-Square Tests<sup>c</sup>**

|                                    | Value             | df | Asymp. Sig. (2-sided) | Exact Sig. (2-sided) | Exact Sig. (1-sided) |
|------------------------------------|-------------------|----|-----------------------|----------------------|----------------------|
| Pearson Chi-Square                 | ,000 <sup>a</sup> | 1  | 1,000                 |                      |                      |
| Continuity Correction <sup>b</sup> | ,000              | 1  | 1,000                 |                      |                      |
| Likelihood Ratio                   | ,000              | 1  | 1,000                 |                      |                      |
| Fisher's Exact Test                |                   |    |                       | 1,000                | ,800                 |
| N of Valid Cases                   | 6                 |    |                       |                      |                      |

a. 4 cells (100,0%) have expected count less than 5. The minimum expected count is 1,00.

b. Computed only for a 2x2 table

c. IMC2 = 1

**Risk Estimate<sup>a</sup>**

|                               | Value | 95% Confidence Interval |        |
|-------------------------------|-------|-------------------------|--------|
|                               |       | Lower                   | Upper  |
| Odds Ratio for RECCLR (1 / 2) | 1,000 | ,034                    | 29,807 |
| For cohort PR = 0             | 1,000 | ,183                    | 5,460  |
| For cohort PR = 1             | 1,000 | ,183                    | 5,460  |
| N of Valid Cases              | 6     |                         |        |

a. IMC2 = 1

**IMC2 = 2**

**Case Processing Summary<sup>a</sup>**

|             | Cases |         |         |         |       |         |
|-------------|-------|---------|---------|---------|-------|---------|
|             | Valid |         | Missing |         | Total |         |
|             | N     | Percent | N       | Percent | N     | Percent |
| RECCLR * PR | 87    | 100,0%  | 0       | ,0%     | 87    | 100,0%  |



**Case Processing Summary<sup>a</sup>**

|             | Cases |         |         |         |       |         |
|-------------|-------|---------|---------|---------|-------|---------|
|             | Valid |         | Missing |         | Total |         |
|             | N     | Percent | N       | Percent | N     | Percent |
| RECNLN * PR | 87    | 100,0%  | 0       | ,0%     | 87    | 100,0%  |

a. IMC2 = 2

**RECNLN \* PR Crosstabulation<sup>a</sup>**

|        |   |             | PR     |        | Total  |
|--------|---|-------------|--------|--------|--------|
|        |   |             | 0      | 1      |        |
| RECNLN | 1 | Count       | 61     | 21     | 82     |
|        |   | % within PR | 93,8%  | 95,5%  | 94,3%  |
|        | 2 | Count       | 4      | 1      | 5      |
|        |   | % within PR | 6,2%   | 4,5%   | 5,7%   |
| Total  |   | Count       | 65     | 22     | 87     |
|        |   | % within PR | 100,0% | 100,0% | 100,0% |

a. IMC2 = 2

**Chi-Square Tests<sup>c</sup>**

|                                    | Value             | df | Asymp. Sig. (2-sided) | Exact Sig. (2-sided) | Exact Sig. (1-sided) |
|------------------------------------|-------------------|----|-----------------------|----------------------|----------------------|
| Pearson Chi-Square                 | ,078 <sup>a</sup> | 1  | ,779                  |                      |                      |
| Continuity Correction <sup>b</sup> | ,000              | 1  | 1,000                 |                      |                      |
| Likelihood Ratio                   | ,082              | 1  | ,774                  |                      |                      |
| Fisher's Exact Test                |                   |    |                       | 1,000                | ,627                 |
| N of Valid Cases                   | 87                |    |                       |                      |                      |

a. 2 cells (50,0%) have expected count less than 5. The minimum expected count is 1,26.

b. Computed only for a 2x2 table

c. IMC2 = 2

**Risk Estimate<sup>a</sup>**

|  | Value | 95% Confidence Interval |       |
|--|-------|-------------------------|-------|
|  |       | Lower                   | Upper |
|  |       |                         |       |

|                               |       |      |       |
|-------------------------------|-------|------|-------|
| Odds Ratio for RECCLR (1 / 2) | ,726  | ,077 | 6,867 |
| For cohort PR = 0             | ,930  | ,589 | 1,468 |
| For cohort PR = 1             | 1,280 | ,213 | 7,680 |
| N of Valid Cases              | 87    |      |       |

a. IMC2 = 2

## IMC2 = 3

**Case Processing Summary<sup>a</sup>**

|             | Cases |         |         |         |       |         |
|-------------|-------|---------|---------|---------|-------|---------|
|             | Valid |         | Missing |         | Total |         |
|             | N     | Percent | N       | Percent | N     | Percent |
| RECCLR * PR | 122   | 100,0%  | 0       | ,0%     | 122   | 100,0%  |

a. IMC2 = 3

**RECCLR \* PR Crosstabulation<sup>a</sup>**

|        |             |             | PR     |        | Total |
|--------|-------------|-------------|--------|--------|-------|
|        |             |             | 0      | 1      |       |
| RECCLR | 1           | Count       | 69     | 41     | 110   |
|        |             | % within PR | 88,5%  | 93,2%  | 90,2% |
| 2      | Count       | 9           | 3      | 12     |       |
|        | % within PR | 11,5%       | 6,8%   | 9,8%   |       |
| Total  | Count       | 78          | 44     | 122    |       |
|        | % within PR | 100,0%      | 100,0% | 100,0% |       |

a. IMC2 = 3

**Chi-Square Tests<sup>c</sup>**

|                    | Value             | df | Asymp. Sig. (2-sided) | Exact Sig. (2-sided) | Exact Sig. (1-sided) |
|--------------------|-------------------|----|-----------------------|----------------------|----------------------|
| Pearson Chi-Square | ,707 <sup>a</sup> | 1  | ,401                  |                      |                      |

|                                    |      |   |      |      |      |
|------------------------------------|------|---|------|------|------|
| Continuity Correction <sup>b</sup> | ,275 | 1 | ,600 |      |      |
| Likelihood Ratio                   | ,744 | 1 | ,388 |      |      |
| Fisher's Exact Test                |      |   |      | ,534 | ,307 |
| N of Valid Cases                   | 122  |   |      |      |      |

a. 1 cells (25,0%) have expected count less than 5. The minimum expected count is 4,33.

b. Computed only for a 2x2 table

c. IMC2 = 3

**Risk Estimate<sup>a</sup>**

|                               | Value | 95% Confidence Interval |       |
|-------------------------------|-------|-------------------------|-------|
|                               |       | Lower                   | Upper |
| Odds Ratio for RECCLR (1 / 2) | ,561  | ,144                    | 2,191 |
| For cohort PR = 0             | ,836  | ,585                    | 1,195 |
| For cohort PR = 1             | 1,491 | ,543                    | 4,091 |
| N of Valid Cases              | 122   |                         |       |

a. IMC2 = 3

**IMC2 = 4**

**Case Processing Summary<sup>a</sup>**

|             | Cases |         |         |         |       |         |
|-------------|-------|---------|---------|---------|-------|---------|
|             | Valid |         | Missing |         | Total |         |
|             | N     | Percent | N       | Percent | N     | Percent |
| RECCLR * PR | 73    | 100,0%  | 0       | ,0%     | 73    | 100,0%  |

a. IMC2 = 4

**RECCLR \* PR Crosstabulation<sup>a</sup>**

|        |   |             | PR    |       | Total |
|--------|---|-------------|-------|-------|-------|
|        |   |             | 0     | 1     |       |
| RECCLR | 1 | Count       | 46    | 17    | 63    |
|        |   | % within PR | 86,8% | 85,0% | 86,3% |

|       |             |        |        |        |
|-------|-------------|--------|--------|--------|
| 2     | Count       | 7      | 3      | 10     |
|       | % within PR | 13,2%  | 15,0%  | 13,7%  |
| Total | Count       | 53     | 20     | 73     |
|       | % within PR | 100,0% | 100,0% | 100,0% |

a. IMC2 = 4

#### Chi-Square Tests<sup>c</sup>

|                                    | Value             | df | Asymp. Sig. (2-sided) | Exact Sig. (2-sided) | Exact Sig. (1-sided) |
|------------------------------------|-------------------|----|-----------------------|----------------------|----------------------|
| Pearson Chi-Square                 | ,039 <sup>a</sup> | 1  | ,843                  |                      |                      |
| Continuity Correction <sup>b</sup> | ,000              | 1  | 1,000                 |                      |                      |
| Likelihood Ratio                   | ,039              | 1  | ,844                  |                      |                      |
| Fisher's Exact Test                |                   |    |                       | 1,000                | ,555                 |
| N of Valid Cases                   | 73                |    |                       |                      |                      |

a. 1 cells (25,0%) have expected count less than 5. The minimum expected count is 2,74.

b. Computed only for a 2x2 table

c. IMC2 = 4

#### Risk Estimate<sup>a</sup>

|                               | Value | 95% Confidence Interval |       |
|-------------------------------|-------|-------------------------|-------|
|                               |       | Lower                   | Upper |
| Odds Ratio for RECCLR (1 / 2) | 1,160 | ,269                    | 5,006 |
| For cohort PR = 0             | 1,043 | ,677                    | 1,608 |
| For cohort PR = 1             | ,899  | ,321                    | 2,520 |
| N of Valid Cases              | 73    |                         |       |

a. IMC2 = 4

```

SPLIT FILE OFF.
USE ALL.
COMPUTE filter_$=(menopausia = 1).
VARIABLE LABEL filter_$ 'menopausia = 1 (FILTER)'.
VALUE LABELS filter_$ 0 'Not Selected' 1 'Selected'.
FORMAT filter_$ (f1.0).
FILTER BY filter_$.
EXECUTE.
CROSSTABS
  /TABLES=RECCLR BY PR

```

```

/FORMAT=AVALUE TABLES
/STATISTICS=CHISQ RISK
/CELLS=COUNT COLUMN
/COUNT ROUND CELL.

```

## Crosstabs

### Notes

|                        |                           |                                                                                                                                   |
|------------------------|---------------------------|-----------------------------------------------------------------------------------------------------------------------------------|
| Output Created         |                           | 25-oct-2016 14:32:09                                                                                                              |
| Comments               |                           |                                                                                                                                   |
| Input                  | Data                      | C:\Users\levasquez\Documents\2016\Matologia\NRI.sav                                                                               |
|                        | Active Dataset            | DataSet1                                                                                                                          |
|                        | Filter                    | menopausia = 1 (FILTER)                                                                                                           |
|                        | Weight                    | <none>                                                                                                                            |
|                        | Split File                | <none>                                                                                                                            |
|                        | N of Rows in Working Data | 114                                                                                                                               |
|                        | File                      |                                                                                                                                   |
| Missing Value Handling | Definition of Missing     | User-defined missing values are treated as missing.                                                                               |
|                        | Cases Used                | Statistics for each table are based on all the cases with valid data in the specified range(s) for all variables in each table.   |
| Syntax                 |                           | CROSSTABS<br>/TABLES=RECNLR BY PR<br>/FORMAT=AVALUE TABLES<br>/STATISTICS=CHISQ RISK<br>/CELLS=COUNT COLUMN<br>/COUNT ROUND CELL. |
| Resources              | Processor Time            | 00:00:00,016                                                                                                                      |
|                        | Elapsed Time              | 00:00:00,016                                                                                                                      |
|                        | Dimensions Requested      | 2                                                                                                                                 |
|                        | Cells Available           | 174762                                                                                                                            |

[DataSet1] C:\Users\evasquez\Documents\2016\Mastologia\NRI.sav

**Case Processing Summary**

|             | Cases |         |         |         |       |         |
|-------------|-------|---------|---------|---------|-------|---------|
|             | Valid |         | Missing |         | Total |         |
|             | N     | Percent | N       | Percent | N     | Percent |
| RECNLN * PR | 114   | 100,0%  | 0       | ,0%     | 114   | 100,0%  |

**RECNLN \* PR Crosstabulation**

|        |   |             | PR     |        | Total  |
|--------|---|-------------|--------|--------|--------|
|        |   |             | 0      | 1      |        |
| RECNLN | 1 | Count       | 67     | 34     | 101    |
|        |   | % within PR | 84,8%  | 97,1%  | 88,6%  |
|        | 2 | Count       | 12     | 1      | 13     |
|        |   | % within PR | 15,2%  | 2,9%   | 11,4%  |
| Total  |   | Count       | 79     | 35     | 114    |
|        |   | % within PR | 100,0% | 100,0% | 100,0% |

**Chi-Square Tests**

|                                    | Value              | df | Asymp. Sig. (2-sided) | Exact Sig. (2-sided) | Exact Sig. (1-sided) |
|------------------------------------|--------------------|----|-----------------------|----------------------|----------------------|
| Pearson Chi-Square                 | 3,651 <sup>a</sup> | 1  | ,056                  |                      |                      |
| Continuity Correction <sup>b</sup> | 2,533              | 1  | ,112                  |                      |                      |
| Likelihood Ratio                   | 4,522              | 1  | ,033                  |                      |                      |
| Fisher's Exact Test                |                    |    |                       | ,063                 | ,047                 |
| N of Valid Cases                   | 114                |    |                       |                      |                      |

a. 1 cells (25,0%) have expected count less than 5. The minimum expected count is 3,99.

b. Computed only for a 2x2 table

**Risk Estimate**

|  | Value | 95% Confidence Interval |
|--|-------|-------------------------|
|  |       |                         |

|                               |       | Lower | Upper  |
|-------------------------------|-------|-------|--------|
| Odds Ratio for RECNLR (1 / 2) | ,164  | ,020  | 1,316  |
| For cohort PR = 0             | ,719  | ,583  | ,886   |
| For cohort PR = 1             | 4,376 | ,653  | 29,343 |
| N of Valid Cases              | 114   |       |        |

```

LOGISTIC REGRESSION VARIABLES PR
  /METHOD=FSSTEP(COND) RECNLR histo grado ILV ajcc T_stage N RE RP
  /CONTRAST (RECNLR)=Indicator(1)
  /CONTRAST (histo)=Indicator(1)
  /CONTRAST (grado)=Indicator(1)
  /CONTRAST (ILV)=Indicator(1)
  /CONTRAST (ajcc)=Indicator(1)
  /PRINT=CI(95)
  /CRITERIA=PIN(0.05) POUT(0.10) ITERATE(20) CUT(0.5).

```

## Logistic Regression

### Notes

|                        |                           |                                                     |
|------------------------|---------------------------|-----------------------------------------------------|
| Output Created         |                           | 25-oct-2016 14:35:20                                |
| Comments               |                           |                                                     |
| Input                  | Data                      | C:\Users\levasquez\Documents\2016\Matologia\NRI.sav |
|                        | Active Dataset            | DataSet1                                            |
|                        | Filter                    | menopausia = 1 (FILTER)                             |
|                        | Weight                    | <none>                                              |
|                        | Split File                | <none>                                              |
|                        | N of Rows in Working Data | 114                                                 |
|                        | File                      |                                                     |
| Missing Value Handling | Definition of Missing     | User-defined missing values are treated as missing  |

|           |                                                                                                                                                                                                                                                                                                                                           |              |
|-----------|-------------------------------------------------------------------------------------------------------------------------------------------------------------------------------------------------------------------------------------------------------------------------------------------------------------------------------------------|--------------|
| Syntax    | <pre> LOGISTIC REGRESSION VARIABLES PR /METHOD=FSTEP(COND) RECNL R histo grado ILV ajcc T_stage N RE RP /CONTRAST (RECNL)=Indicator(1) /CONTRAST (histo)=Indicator(1) /CONTRAST (grado)=Indicator(1) /CONTRAST (ILV)=Indicator(1) /CONTRAST (ajcc)=Indicator(1) /PRINT=CI(95) /CRITERIA=PIN(0.05) POUT(0.10) ITERATE(20) CUT(0.5). </pre> |              |
| Resources | Processor Time                                                                                                                                                                                                                                                                                                                            | 00:00:00,016 |
|           | Elapsed Time                                                                                                                                                                                                                                                                                                                              | 00:00:00,016 |

[DataSet1] C:\Users\evasquez\Documents\2016\Mastologia\NRI.sav

#### Case Processing Summary

| Unweighted Cases <sup>a</sup> |                      | N   | Percent |
|-------------------------------|----------------------|-----|---------|
| Selected Cases                | Included in Analysis | 114 | 100,0   |
|                               | Missing Cases        | 0   | ,0      |
|                               | Total                | 114 | 100,0   |
| Unselected Cases              |                      | 0   | ,0      |
| Total                         |                      | 114 | 100,0   |

a. If weight is in effect, see classification table for the total number of cases.

b. The category variable histo is constant for the selected cases. Since a constant term was specified, the variable will be removed from the analysis.

c. The category variable grado is constant for the selected cases. Since a constant term was specified, the variable will be removed from the analysis.

d. The category variable ILV is constant for the selected cases. Since a constant term was specified, the variable will be removed from the analysis.



**Case Processing Summary**

| Unweighted Cases <sup>a</sup> |                      | N   | Percent |
|-------------------------------|----------------------|-----|---------|
| Selected Cases                | Included in Analysis | 114 | 100,0   |
|                               | Missing Cases        | 0   | ,0      |
|                               | Total                | 114 | 100,0   |
| Unselected Cases              |                      | 0   | ,0      |
| Total                         |                      | 114 | 100,0   |

a. If weight is in effect, see classification table for the total number of cases.

b. The category variable histo is constant for the selected cases. Since a constant term was specified, the variable will be removed from the analysis.

c. The category variable grado is constant for the selected cases. Since a constant term was specified, the variable will be removed from the analysis.

d. The category variable ILV is constant for the selected cases. Since a constant term was specified, the variable will be removed from the analysis.

e. The category variable ajcc is constant for the selected cases. Since a constant term was specified, the variable will be removed from the analysis.

**Dependent Variable Encoding**

| Original Value | Internal Value |
|----------------|----------------|
| 0              | 0              |
| - 1            | 1              |

**Categorical Variables Codings**

|        |   | Frequency | Parameter coding |
|--------|---|-----------|------------------|
|        |   |           | (1)              |
| RECCLR | 1 | 101       | ,000             |
|        | 2 | 13        | 1,000            |

## Block 0: Beginning Block

Classification Table<sup>a,b</sup>

| Observed           |    |   | Predicted |   |                    |
|--------------------|----|---|-----------|---|--------------------|
|                    |    |   | PR        |   | Percentage Correct |
|                    |    |   | 0         | 1 |                    |
| Step 0             | PR | 0 | 79        | 0 | 100,0              |
|                    |    | 1 | 35        | 0 | ,0                 |
| Overall Percentage |    |   |           |   | 69,3               |

a. Constant is included in the model.

b. The cut value is ,500

Variables in the Equation

|        |          | B     | S.E. | Wald   | df | Sig. | Exp(B) |
|--------|----------|-------|------|--------|----|------|--------|
| Step 0 | Constant | -,814 | ,203 | 16,075 | 1  | ,000 | ,443   |

Variables not in the Equation

|                    |           |           | Score  | df | Sig. |
|--------------------|-----------|-----------|--------|----|------|
| Step 0             | Variables | RECCLR(1) | 3,651  | 1  | ,056 |
|                    |           | T_stage   | 2,935  | 1  | ,087 |
|                    |           | N         | 2,204  | 1  | ,138 |
|                    |           | RE        | 8,102  | 1  | ,004 |
|                    |           | RP        | 5,017  | 1  | ,025 |
| Overall Statistics |           |           | 15,288 | 5  | ,009 |

## Block 1: Method = Forward Stepwise (Conditional)

Omnibus Tests of Model Coefficients

|  | Chi-square | df | Sig. |
|--|------------|----|------|
|--|------------|----|------|

|        |       |        |   |      |
|--------|-------|--------|---|------|
| Step 1 | Step  | 8,036  | 1 | ,005 |
|        | Block | 8,036  | 1 | ,005 |
|        | Model | 8,036  | 1 | ,005 |
| Step 2 | Step  | 5,337  | 1 | ,021 |
|        | Block | 13,373 | 2 | ,001 |
|        | Model | 13,373 | 2 | ,001 |

#### Model Summary

| Step | -2 Log likelihood    | Cox & Snell R Square | Nagelkerke R Square |
|------|----------------------|----------------------|---------------------|
| 1    | 132,570 <sup>a</sup> | ,068                 | ,096                |
| 2    | 127,233 <sup>b</sup> | ,111                 | ,156                |

a. Estimation terminated at iteration number 4 because parameter estimates changed by less than ,001.

b. Estimation terminated at iteration number 5 because parameter estimates changed by less than ,001.

#### Classification Table<sup>a</sup>

| Observed           |    |   | Predicted |    |                    |
|--------------------|----|---|-----------|----|--------------------|
|                    |    |   | PR        |    | Percentage Correct |
|                    |    |   | 0         | 1  |                    |
| Step 1             | PR | 0 | 79        | 0  | 100,0              |
|                    |    | 1 | 35        | 0  | ,0                 |
| Overall Percentage |    |   |           |    | 69,3               |
| Step 2             | PR | 0 | 60        | 19 | 75,9               |
|                    |    | 1 | 14        | 21 | 60,0               |
| Overall Percentage |    |   |           |    | 71,1               |

a. The cut value is ,500

#### Variables in the Equation

|                     |          | B      | S.E. | Wald  | df | Sig. | Exp(B) |
|---------------------|----------|--------|------|-------|----|------|--------|
| Step 1 <sup>a</sup> | RE       | -1,176 | ,421 | 7,783 | 1  | ,005 | ,309   |
|                     | Constant | -,174  | ,296 | ,347  | 1  | ,556 | ,840   |

|                     |           |        |       |       |   |      |       |
|---------------------|-----------|--------|-------|-------|---|------|-------|
| Step 2 <sup>b</sup> | RECCLR(1) | -1,997 | 1,081 | 3,409 | 1 | ,065 | ,136  |
|                     | RE        | -1,262 | ,433  | 8,508 | 1 | ,004 | ,283  |
|                     | Constant  | ,027   | ,313  | ,007  | 1 | ,932 | 1,027 |

a. Variable(s) entered on step 1: RE.

b. Variable(s) entered on step 2: RECCLR.

**Variables in the Equation**

|                     |           | 95% C.I. for EXP(B) |       |
|---------------------|-----------|---------------------|-------|
|                     |           | Lower               | Upper |
| Step 1 <sup>a</sup> | RE        | ,135                | ,705  |
|                     | Constant  |                     |       |
| Step 2 <sup>b</sup> | RECCLR(1) | ,016                | 1,131 |
|                     | RE        | ,121                | ,661  |
|                     | Constant  |                     |       |

a. Variable(s) entered on step 1: RE.

b. Variable(s) entered on step 2: RECCLR.

**Model if Term Removed<sup>a</sup>**

| Variable      | Model Log Likelihood | Change in -2 Log Likelihood | df | Sig. of the Change |
|---------------|----------------------|-----------------------------|----|--------------------|
| Step 1 RE     | -70,347              | 8,123                       | 1  | ,004               |
| Step 2 RECCLR | -66,347              | 5,462                       | 1  | ,019               |
| RE            | -68,087              | 8,941                       | 1  | ,003               |

a. Based on conditional parameter estimates

**Variables not in the Equation**

|        |                    |           | Score | df | Sig. |
|--------|--------------------|-----------|-------|----|------|
| Step 1 | Variables          | RECCLR(1) | 4,358 | 1  | ,037 |
|        |                    | T_stage   | 3,336 | 1  | ,068 |
|        |                    | N         | 1,632 | 1  | ,201 |
|        |                    | RP        | ,193  | 1  | ,661 |
|        | Overall Statistics |           | 7,610 | 4  | ,107 |
| Step 2 | Variables          | T_stage   | 2,277 | 1  | ,131 |
|        |                    | N         | 1,380 | 1  | ,240 |

|                    |       |   |      |
|--------------------|-------|---|------|
| RP                 | ,179  | 1 | ,672 |
| Overall Statistics | 3,456 | 3 | ,326 |
